# Supplementary material for: Interventions to Promote Early Discharge and Avoid Inappropriate Hospital (Re)Admission: A Systematic Review
Source: MDPI journal article supplement (doi:10.3390/ijerph16142457), 2019-07-10
Supplement: s1 [file s1]

## S1: Final Search Strings

Search terms for discharge hospital (re)admission avoidance within the PICOS Framework

|              |                                                                                                                                                                                                                                                                                                                                                                                                                                                                                                                                                                                                                                                                                                                                                                                                               |
|--------------|---------------------------------------------------------------------------------------------------------------------------------------------------------------------------------------------------------------------------------------------------------------------------------------------------------------------------------------------------------------------------------------------------------------------------------------------------------------------------------------------------------------------------------------------------------------------------------------------------------------------------------------------------------------------------------------------------------------------------------------------------------------------------------------------------------------|
| Population   | Individuals of all ages from childhood (excluding neonate) through to the elderly within the context of acute hospital settings i.e. in-patient, intra-hospital, inter-hospital transition/discharge, discharged into community/home/other health service setting, or hospital (re)admission avoidance from the community/ home/other health service setting.                                                                                                                                                                                                                                                                                                                                                                                                                                                 |
| Intervention | <b>Discharge N31</b><br>Search terms in title/abstract using Boolean phrase OR for each string as follows:<br>"bed occupancy" or "bed block*" or "bed use" or "bed utilization" or "bed utilisation" or utilization or utilisation or delayed "long stay" or "length of stay" or early "patient flow" or destination or transition* or transfer or "patient journey"<br>"intermediate care" or "step down" or "step-down" or aftercare or "after care" or "follow up" or follow-up<br>homecare or "home care" or "home health care" or nursing<br>"residential care" or community or "continuity of care" or "long term care" or "primary care" or "integrated care" or "community care"<br>readmission or rehospital* or admission or "admission avoidance" or readmit* or hospital or "emergency admission" |

1 A proximity search was applied to the concept 'discharge' using the proximity operator N (Near) and the number 3 in order to retrieve papers that had the search terms in each string within three words of the word 'discharge'.

“estimated date” or plan\* or assess\* or ready or readiness or instruction or timing or structured  
 model or intervention or systems or policy or policies or protocol or computer\* or technolog\* or email or mobile or automated  
 The above search was combined with the following Subject Headings (applicable only to CINAHL & MEDLINE) using Boolean phrase OR  
 CINAHL: "After Care" or "Patient Discharge" or "Discharge Planning" or "Early Patient Discharge" or "Transfer, Discharge"  
 MEDLINE: "Patient Discharge" OR "Patient Discharge Summaries"  
 Admiss\* or Admit\* or Reamiss\* or Readmit\* N3  
 Search terms in title/abstract using Boolean phrase OR for each string as follows:  
 “hospital avoidance” or avoid\* or prevent\* or unplanned or reduc\*  
 "bed occupancy" or "bed block\*" or "bed use" or "bed utilization" or "bed utilisation" or utilization or utilization or delayed  
 "patient flow" or destination or transition\* or transfer or "patient journey" or wait\*  
 "intermediate care" or "step down" or "step-down" or aftercare or "after care" or "follow up" or follow-up or homecare or "home care" or "home health care" or nursing or "residential care" or community or "continuity of care" or "long term care" or “primary care” or “integrated care”  
 model or intervention or systems or policy or policies or protocol or computer\* or technolog\* or email or mobile or automated  
 The above search was combined with the following Subject Headings (applicable only to CINAHL & MEDLINE) using Boolean phrase OR  
 CINAHL: “Patient Admission” or “Readmission”  
 MEDLINE: “Patient Admission” or “Readmission”

|            |                                                                                                                                                                                                                                                                                                                                            |
|------------|--------------------------------------------------------------------------------------------------------------------------------------------------------------------------------------------------------------------------------------------------------------------------------------------------------------------------------------------|
| Comparison | Standard care/no intervention/another intervention                                                                                                                                                                                                                                                                                         |
| Outcomes   | <p>Service oriented: discharge rates; discharge timing; length of stay, bed utilization, bed occupancy; readmission rates; resource utilization; costs to health service providers, costs to social care providers.</p> <p>Patient outcomes: patient safety, mortality; health status/morbidity, patient satisfaction, quality of life</p> |
| Studies    | meta-analyses, meta-syntheses, meta-reviews, systematic reviews, and randomized controlled trials.                                                                                                                                                                                                                                         |
